# Supplementary material for: Sputum microbiome profiling in COPD: beyond singular pathogen detection
Source: PubMed Central journal article supplement (PMC7231454; doi:10.1136/thoraxjnl-2019-214168), 2020-01-29
Supplement: thoraxjnl-2019-214168supp001.pdf [file thoraxjnl-2019-214168supp001.pdf]

**Supplementary Table 1.** Summary of studies investigating the microbiome in sputum samples of COPD participants

| Author (Year)                             | Sequencing technique | Participants characteristics                                       | Summary findings                                                                                                                                                                                                                                                                                                                                                                                                                                                                    |
|-------------------------------------------|----------------------|--------------------------------------------------------------------|-------------------------------------------------------------------------------------------------------------------------------------------------------------------------------------------------------------------------------------------------------------------------------------------------------------------------------------------------------------------------------------------------------------------------------------------------------------------------------------|
| Cabrera-Rubio, et al. (2012) <sup>1</sup> | 16S rRNA             | 8 participants in stable phase                                     | -Microbiome profiling in sputum, bronchial aspirate, BAL and bronchial mucosal biopsy revealed lower diversity in sputum samples compared to the other 3 sample types                                                                                                                                                                                                                                                                                                               |
| Molyneaux, et al. (2013) <sup>2</sup>     | 16S rRNA, qPCR       | 14 participants in stable phase, 17 healthy controls               | -After rhinovirus infection, there was a rise in bacterial burden and outgrowth of <i>Haemophilus influenza</i> from pre-existing microbiota in COPD participants. This was not observed in healthy controls.                                                                                                                                                                                                                                                                       |
| Garcia-Nunez, et al. (2014) <sup>3</sup>  | 16S rRNA             | 17 participants in stable phase                                    | -Most prevalent phyla were Proteobacteria, Firmicutes, and Actinobacteria<br>-Patients with moderate disease showed greater microbial diversity than patients with advanced disease<br>- Alpha diversity was decreased in patients with advanced disease                                                                                                                                                                                                                            |
| Galiana, et al. (2014) <sup>4</sup>       | 16S rRNA, qPCR       | 19 participants in stable phase                                    | -Bacterial diversity was higher in patients with moderate COPD than with severe COPD<br>-Bacterial load was higher in severe COPD<br>-In severe COPD patients, the composition of bacterial genera differed more among themselves, than samples from the mild/moderate group                                                                                                                                                                                                        |
| Huang, et al. (2014) <sup>5</sup>         | 16S rRNA, qPCR       | 12 participants; sample collection before, during and after AECOPD | -Abundance of several bacterial phyla differed between stable phase and AECOPD, where Proteobacteria abundance was increased during AECOPD<br>- Steroid and antibiotic therapy showed opposite effects on the microbiome, whereby steroid therapy increased Proteobacteria abundance<br>- <i>Haemophilus influenza</i> abundance was positively correlated to the abundance of phylogenetically related bacteria, whereas the abundance of other bacteria was negatively correlated |
| Barker, et al. (2015) <sup>6</sup>        | 16S rRNA, qPCR       | 120 participants in stable phase, 55 paired stable and AECOPD data | - <i>Haemophilus influenza</i> bacterial load was an independent predictor of sputum TNF-alpha and IL-1beta levels in stable state<br>- at AECOPD, change of <i>Moraxella catarrhalis</i> bacterial load compared to                                                                                                                                                                                                                                                                |

|                                           |                                |                                                                                                           |                                                                                                                                                                                                                                                                                                                                                                                                                                                                                                                                                                                         |
|-------------------------------------------|--------------------------------|-----------------------------------------------------------------------------------------------------------|-----------------------------------------------------------------------------------------------------------------------------------------------------------------------------------------------------------------------------------------------------------------------------------------------------------------------------------------------------------------------------------------------------------------------------------------------------------------------------------------------------------------------------------------------------------------------------------------|
|                                           |                                |                                                                                                           | stable state correlated with change in sputum TNF-alpha and IL-1beta concentration; this was not observed in <i>Haemophilus influenza</i>                                                                                                                                                                                                                                                                                                                                                                                                                                               |
| Millares, et al. (2015) <sup>7</sup>      | 16S rRNA, metagenomics         | 8 participants with severe COPD; sample collection during stable phase and AECOPD                         | <ul style="list-style-type: none"> <li>- The relative abundance of bacterial phyla and genera were consistent between stable phase and AECOPD</li> <li>-Functional pathways changed at AECOPD events, indicating a shift of the metabolic functionality of the microbiome towards AECOPD</li> </ul>                                                                                                                                                                                                                                                                                     |
| Brill, et al. (2015) <sup>8</sup>         | Sputum culture; 16S rRNA, qPCR | 99 participants in stable phase, 86 completed follow up,                                                  | <ul style="list-style-type: none"> <li>-A randomized controlled trial investigating different antibiotic classes (moxifloxacin, doxycycline, azithromycin, placebo)</li> <li>-Total airway bacterial load did not decrease after 3 months of antibiotic therapy</li> <li>-Increases in antibiotic resistance in all treatment groups</li> </ul>                                                                                                                                                                                                                                         |
| Wang, et al. (2016) <sup>9</sup>          | 16S rRNA, qPCR                 | 87 participants; sample collection during stable state, AECOPD, 2 weeks post-therapy and 6 weeks recovery | <ul style="list-style-type: none"> <li>-Sputum microbiome profiles were dynamic from stable state towards AECOPD, involving the change of microbial diversities, abundances of bacterial communities and the outgrowth of “keystone bacteria”, such as <i>Haemophilus</i> or <i>Moraxella</i> spp.</li> <li>-Microbiome structure and diversity were correlated with serum and sputum biomarkers</li> <li>-Steroid and antibiotic therapy showed opposite effects on the microbiome with respect to diversity and outgrowth of individual bacteria and bacterial communities</li> </ul> |
| Wang, et al. (2017) <sup>10</sup>         | 16S rRNA                       | 281 participants; sample collection at baseline and AECOPD                                                | <ul style="list-style-type: none"> <li>- Microbiome composition shifted from highly diverse to less diverse during AECOPD, where few bacterial genera become predominant abundant</li> <li>-Bacterial dysbiosis was associated with increased exacerbation severity, indicated by higher CAT scores and decrease of lung capacity</li> <li>-Microbial dysbiosis, in concert with eosinophilic inflammation, was associated with even higher exacerbation severity</li> </ul>                                                                                                            |
| Leitao Filho, et al. (2018) <sup>11</sup> | 16S rRNA                       | 102 participants hospitalized due to AECOPD, followed for one year after discharge                        | <ul style="list-style-type: none"> <li>- Microbiome profile in hospitalized AECOPD patients is significantly associated with 1-year mortality</li> <li>-Reduced microbial diversity indicated poorer survival prognosis</li> <li>-The combined absence of <i>Veillonella</i>/presence of <i>Staphylococcus</i></li> </ul>                                                                                                                                                                                                                                                               |

|                                     |                                                       |                                                                                                                                                         |                                                                                                                                                                                                                                                                                                                                                                                                                                                                                                                                                                                                                                                                                                                                                                                                          |
|-------------------------------------|-------------------------------------------------------|---------------------------------------------------------------------------------------------------------------------------------------------------------|----------------------------------------------------------------------------------------------------------------------------------------------------------------------------------------------------------------------------------------------------------------------------------------------------------------------------------------------------------------------------------------------------------------------------------------------------------------------------------------------------------------------------------------------------------------------------------------------------------------------------------------------------------------------------------------------------------------------------------------------------------------------------------------------------------|
|                                     |                                                       |                                                                                                                                                         | was associated with an increased risk of 1-year mortality by 85-fold                                                                                                                                                                                                                                                                                                                                                                                                                                                                                                                                                                                                                                                                                                                                     |
| Ghebre, et al. (2018) <sup>12</sup> | 16S rRNA, RT-PCR panel for common respiratory viruses | 73 participants with AECOPD, 32 asthmatic patients with exacerbation                                                                                    | <ul style="list-style-type: none"> <li>-Asthma and COPD patients share 3 exacerbation biological clusters after integrating microbiome profiles and host-inflammatory profiles</li> <li>-Cluster 1: increased pro-inflammatory mediators, evidence of neutrophilic inflammation, bacteria-associated with increased proportions of Proteobacteria and Proteobacteria/Firmicutes ratio</li> <li>-Cluster 2: increased blood and sputum eosinophils, type 2 mediators and increased proportions of Bacteroidetes</li> <li>-Cluster 3: increased type 1 mediators and proportions of Actinobacteria and Firmicutes</li> </ul>                                                                                                                                                                               |
| Sinha, et al. (2018) <sup>13</sup>  | 16S rRNA                                              | 4 participants; sample collection during stable phase (two-days, 2-9 months)                                                                            | <ul style="list-style-type: none"> <li>-Alpha diversity is similar over a two-day period</li> <li>-Microbiome variability was increased over a 9-months period</li> <li>-Firmicutes was the most prevalent phylum, followed by Bacteroidetes</li> </ul>                                                                                                                                                                                                                                                                                                                                                                                                                                                                                                                                                  |
| Mayhew et al. (2018) <sup>14</sup>  | 16S rRNA                                              | 101 participants, 584 (spontaneous and induced) sputum samples from stable and exacerbation time points over 1 year                                     | <ul style="list-style-type: none"> <li>-Subtypes of COPD have distinct bacterial compositions and stabilities over time</li> <li>- Microbiome profiles show less variation within an individual than between individuals, however, some individuals exhibited high variability over time</li> <li>- With increasing disease severity, the abundance of Proteobacteria increases, whereas diversity overall decreases</li> <li>-No significant changes of diversity or taxa relative abundance between stable and exacerbation phase (with the exception of <i>Moraxella</i> spp.)</li> <li>-COPD patients with higher exacerbation frequencies exhibit less stable lung microbiome over time</li> <li>- Microbiome composition of bacterial exacerbations differs from viral and eosinophilic</li> </ul> |
| Wang et al. (2019) <sup>15</sup>    | 16S rRNA, qPCR, host RNA microarray, Proteomic assay  | 16 healthy controls, 43 participants with COPD, sample collection during stable state, AECOPD, 2 weeks post-therapy and 6 weeks recovery, 6 months from | <ul style="list-style-type: none"> <li>- stable COPD patients showed a significantly increased relative abundance of the genera <i>Moraxella</i>, <i>Streptococcus</i> and Actinobacteria, as well as decreased alpha diversity, compared to healthy controls</li> <li>-the relative abundance of <i>Moraxella</i> was increased at stable state in GOLD III versus II patients and in ICS versus non-ICS exposed patients</li> <li>- During AECOPD, the relative abundance of <i>Moraxella</i> was increased and alpha</li> </ul>                                                                                                                                                                                                                                                                       |

|  |  |                        |                                                                                                                                                                                                                                                                                                                                                                                                                                                                                     |
|--|--|------------------------|-------------------------------------------------------------------------------------------------------------------------------------------------------------------------------------------------------------------------------------------------------------------------------------------------------------------------------------------------------------------------------------------------------------------------------------------------------------------------------------|
|  |  | the first stable visit | diversity decreased compared to the stable state, along with significantly increased neutrophil and decreased macrophage percentage.<br>- the trend of increased <i>Moraxella</i> and decreased alpha diversity was reversed at post- exacerbation time points<br>- significant associations between <i>Moraxella</i> and <i>Haemophilus</i> with host transcriptome and proteome profiles of host interferon and pro-inflammatory signaling pathways and neutrophilic inflammation |
|--|--|------------------------|-------------------------------------------------------------------------------------------------------------------------------------------------------------------------------------------------------------------------------------------------------------------------------------------------------------------------------------------------------------------------------------------------------------------------------------------------------------------------------------|

qPCR=quantitative PCR; AECOPD= acute exacerbations of COPD

## REFERENCES:

1. Cabrera-Rubio R, Garcia-Núñez M, Setó L, et al. Microbiome diversity in the bronchial tracts of patients with chronic obstructive pulmonary disease. *J Clin Microbiol.* 2012;50(11):3562-3568.
2. Molyneaux PL, Mallia P, Cox MJ, et al. Outgrowth of the bacterial airway microbiome after rhinovirus exacerbation of chronic obstructive pulmonary disease. *Am J Respir Crit Care Med.* 2013;188(10):1224-1231.
3. Garcia-Nunez M, Millares L, Pomares X. Severity-Related Changes of Bronchial Microbiome in Chronic Obstructive Pulmonary Disease. *J Clin Microbiol.* 2014;52(12):4217-4223.
4. Galiana A, Aguirre E, Rodriguez JC. Sputum microbiota in moderate versus severe patients with COPD. *Eur Respir J.* 2014;43(6):1787-1790.
5. Huang YJ, Sethi S, Murphy T, et al. Airway microbiome dynamics in exacerbations of chronic obstructive pulmonary disease. *J Clin Microbiol.* 2014;52(8):2813-2823.
6. Barker BL, Haldar K, Patel H, et al. Association between pathogens detected using quantitative polymerase chain reaction with airway inflammation in COPD at stable state and exacerbations. *Chest.* 2015;147(1):46-55.
7. Millares L, Pérez-Brocal V, Ferrari R, et al. Functional metagenomics of the bronchial microbiome in COPD. *PLoS One.* 2015;10(12): e0144448.
8. Brill SE, Law M, El-Emir E, et al. Effects of different antibiotic classes on airway bacteria in stable COPD using culture and molecular techniques: A randomised controlled trial. *Thorax.* 2015;70(10):930-938.
9. Wang Z, Bafadhel M, Haldar K, et al. Lung microbiome dynamics in COPD exacerbations. *Eur Respir J.* 2016;47(4):1082-1092.
10. Wang Z, Bafadhel M, Haldar K, et al. Lung microbiome dynamics in COPD exacerbations. *Eur Respir J.* 2016;47(4):1082-1092.
11. Leitao Filho FS, Alotaibi NM, Ngan D, et al. Sputum microbiome is associated with 1-

- year mortality after chronic obstructive pulmonary disease hospitalizations. *Am J Respir Crit Care Med* 2019;199:1205–1213.
12. Ghebre MA, Pang PH, Diver S, et al. Biological exacerbation clusters demonstrate asthma and chronic obstructive pulmonary disease overlap with distinct mediator and microbiome profiles. *J Allergy Clin Immunol*. 2018;141(6):2027-2036.e12.
  13. Sinha R, Weissenburger-Moser LA, Clarke JL, et al. Short term dynamics of the sputum microbiome among COPD patients. *PLoS One*. 2018;13(3):e0191499.
  14. Mayhew D, Devos N, Lambert C, et al. Longitudinal profiling of the lung microbiome in the AERIS study demonstrates repeatability of bacterial and eosinophilic COPD exacerbations. *Thorax*. 2018;73(5):422-430.
  15. Wang Z, Maschera B, Lea S, et al. Airway host-microbiome interactions in chronic obstructive pulmonary disease. *Respir Res*. 2019;20(1): 113.
